# Supplementary material for: Quantification of Internalized Silica Nanoparticles via STED Microscopy
Source: Hindawi journal article supplement (doi:10.1155/2015/961208), 2015-01-01
Supplement: f1 [file 961208.f1.pdf]

## Additional files

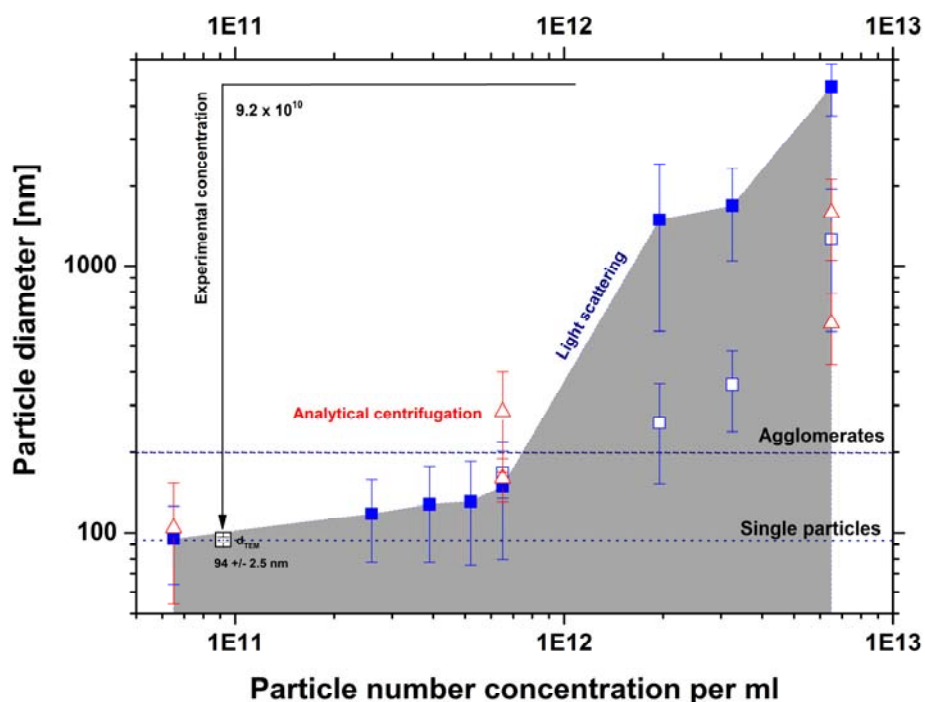

### Additional file 1 – Agglomeration behavior of SiO<sub>2</sub> nanoparticles as a function of particle concentration in cell culture medium

Silica nanoparticles ( $d_{EM} = 94 \pm 2.5$  nm, black open squares) were incubated in DMEM + 10 % FBS for  $t = 5$  h to investigate the agglomeration behavior as a function of particle concentration (concentration range:  $6.5 \cdot 10^{10}$  -  $6.5 \cdot 10^{12}$  particles per ml). Light scattering (blues squares) and analytical centrifugation (red triangles) were employed to measure and calculate the (hydrodynamic) particle diameter. Under experimental conditions (particle number concentration:  $9.2 \cdot 10^{10}$ ), neither light scattering experiments nor analytical centrifugation indicated a significant amount of particle agglomeration. At higher particle concentrations ( $> 2 \cdot 10^{12}$  particles  $ml^{-1}$ ), agglomeration of particles was detected, with agglomerate sizes in the range of several hundred nanometers up to  $> 4 \mu m$ . Error bars represent the standard deviation of the particle size.

| Si-25-FD     |                                       |                                  | Si-85-FD     |                                       |                                  |
|--------------|---------------------------------------|----------------------------------|--------------|---------------------------------------|----------------------------------|
| objects/cell | IsoVolume cell<br>( $\mu\text{m}^3$ ) | cell area<br>( $\mu\text{m}^2$ ) | objects/cell | IsoVolume cell<br>( $\mu\text{m}^3$ ) | cell area<br>( $\mu\text{m}^2$ ) |
| 565          | 5.654000E+02                          | 888                              | 604          | 1.176410E+03                          | 1407                             |
| 36           | 1.721330E+03                          | 1226                             | 471          | 1.680680E+03                          | 1653                             |
| 22           | 2.261500E+03                          | 1089                             | 524          | 1.491940E+03                          | 1209                             |
| 9            | 9.011600E+02                          | 1847                             | 230          | 1.116830E+03                          | 593                              |
| 225          | 1.751700E+03                          | 658                              | 238          | 1.735560E+03                          | 795                              |
| 124          | 1.848460E+03                          | 1465                             | 131          | 2.139590E+03                          | 742                              |
| 15           | 2.064790E+03                          | 819                              | 431          | 2.466130E+03                          | 1137                             |
| 76           | 1.768650E+03                          | 591                              | 396          | 1.067330E+03                          | 1261                             |
| 28           | 7.782300E+02                          | 942                              | 55           | 1.034590E+03                          | 1546                             |
| 147          | 1.306120E+03                          | 991                              | 386          | 1.857310E+03                          | 1622                             |
| 27           | 2.590470E+03                          | 1883                             | 122          | 9.473500E+02                          | 807                              |
| 83           | 6.282300E+02                          | 834                              | 211          | 1.043310E+03                          | 1105                             |
| 53           | 2.104180E+03                          | 827                              | 225          | 1.522490E+03                          | 1315                             |
| 55           | 2.104180E+03                          | 670                              | 645          | 8.414900E+02                          | 1364                             |
| 124          | 9.584000E+02                          | 1077                             | 415          | 1.065980E+03                          | 1158                             |
| 58           | 1.37E+03                              | 697                              | 250          | 2.778680E+03                          | 1123                             |
| 68           | 2.249340E+03                          | 1258                             | 408          | 2.982320E+03                          | 1320                             |
| 281          | 2.598450E+03                          | 1335                             |              |                                       |                                  |
| 156          | 7.434600E+02                          | 1080                             |              |                                       |                                  |
| 166          | 2.164770E+03                          | 1336                             |              |                                       |                                  |
| 147          | 1.625110E+03                          | 1554                             |              |                                       |                                  |

**Additional file 2 – Quantification analysis data.**

Values of objects per cell, cell volume and cell area as determined by image analysis (as described in the method section) are given.

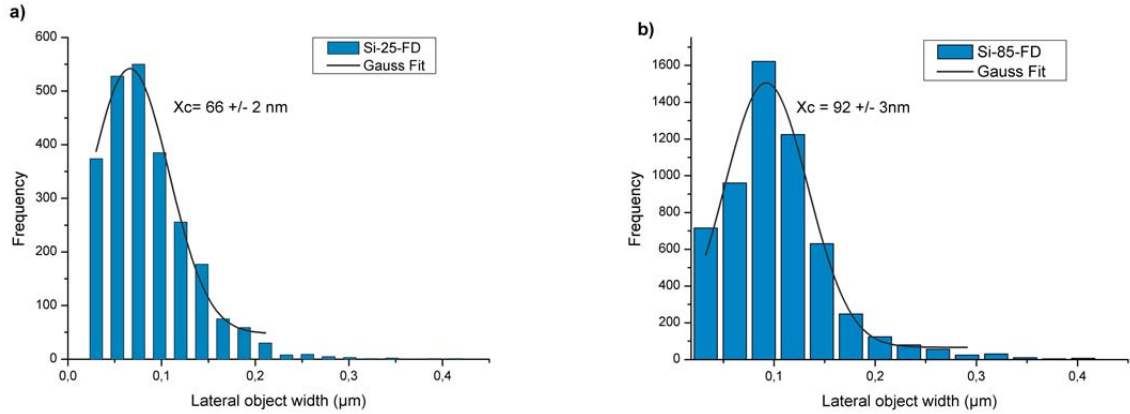

**Additional file 3 – Histogram of lateral widths of internalized objects measured after exposition of A549 cells to a) Si-25-FD and b) Si-85-FD.**

Histograms show the lateral widths (WiLatC) of objects, measured by application of the Huygens software (For more information see: <http://www.svi.nl/ObjectAnalyzerGeometry>). The peak position ( $x_c$ ) of the Gaussian fit in b) at 92 nm indicates that mainly single NPs were measured.

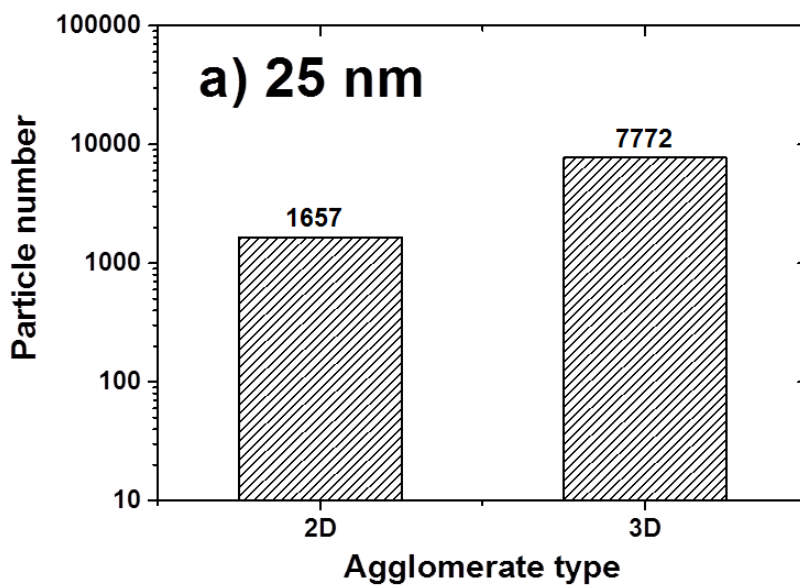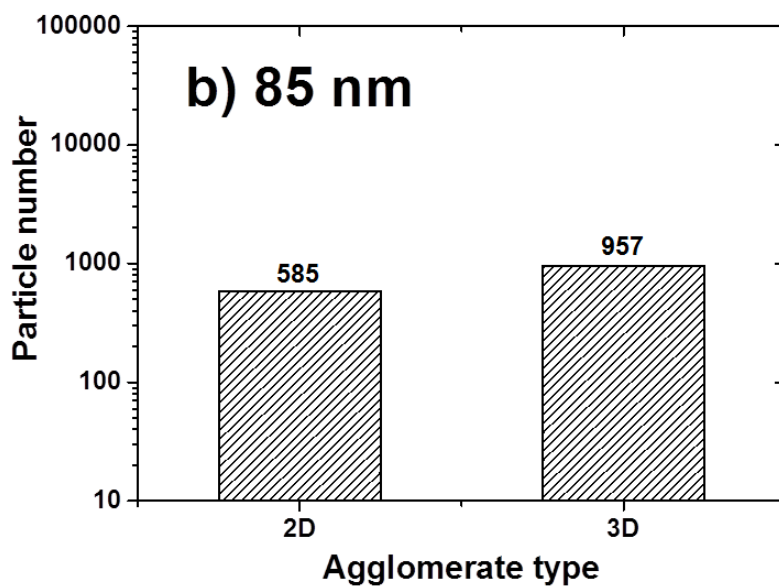

Additional file 4 – Estimated NP number per cell, according to a two-dimensional (2D) and a three-dimensional (3D) agglomerate model. a) 25 nm particles, b) 85 nm particles.

The NP number per cell was calculated assuming that the particles form either two- or three-dimensional agglomerates. Depending on the agglomeration model, the

maximal amount of nanoparticles per agglomerate was calculated under the assumption that the silica nanoparticles are hard spheres and (according to Keplers conjecture [64]) that no greater average density than that of hexagonal or cubic close packaging can be achieved (optimal packing density: 2D ~ 90.69 %, 3D ~ 74 %). Thus, for each lateral width of internalized objects, the maximum number of particles was calculated, added up to yield the total particle number, and divided by the number of cells to yield the mean NP number per cell.

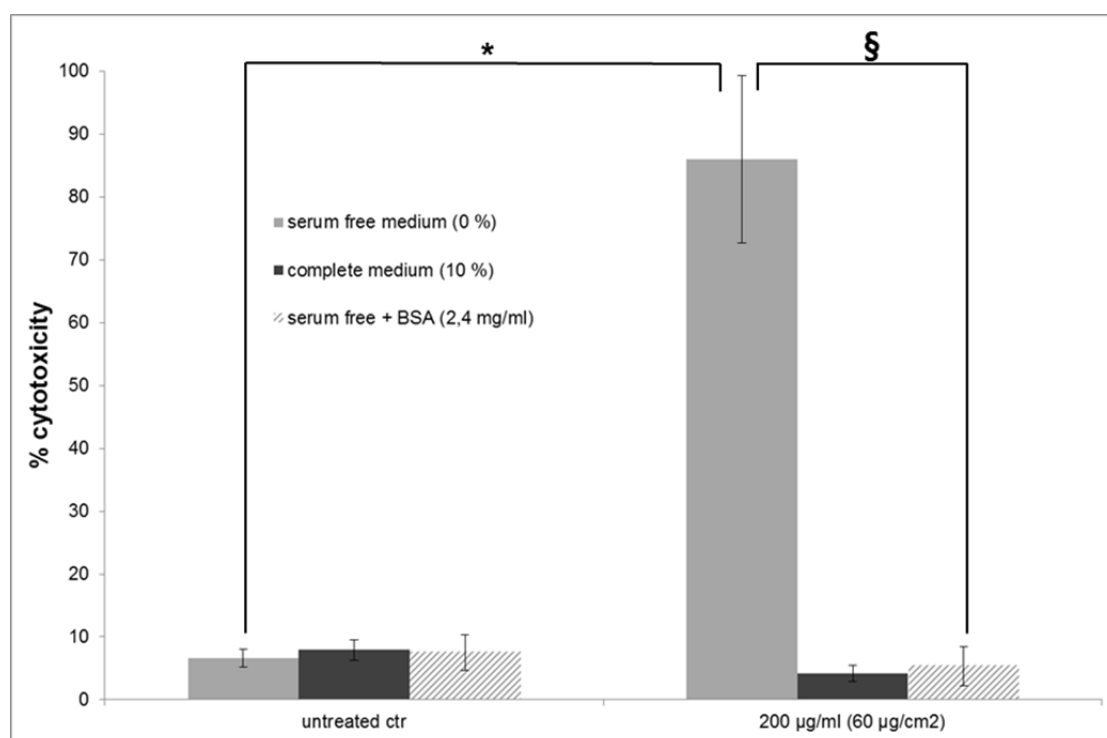

**Additional file 5 – BSA prevents membrane damage induced by Si-25 in absence of serum.**

A549 cells were incubated with 200 µg ml<sup>-1</sup> of Si-25 particles in complete, in serum free or in serum free medium supplemented with 2.4 mg BSA ml<sup>-1</sup>. LDH assay was performed after 5 h incubation, using the culture supernatant. Exposure to 200 µg ml<sup>-1</sup>

Si-25 in serum free medium induced cell damage in 90 % of A549 cells compared to untreated controls (ctr). Supplementation of serum free medium with 2.4 mg BSA ml<sup>-1</sup>, corresponding to the BSA concentration present in complete growth medium (10% serum), reduced the particle induced cytotoxicity to control levels. Error bars represent standard deviation of three independent experiments. \*significantly different from untreated control,  $p < 0.05$ ; §significantly different from serum free medium,  $p < 0.05$ .
